# Supplementary material
Source: Copernicus journal article supplement (doi:10.5194/egusphere-2026-1992)
Supplement: Supplementary file 1 [file egusphere-2026-1992-supplement.pdf]

# From Single Compounds to Ambient Aerosols: A Machine-Learning-Based Estimation of Organic Hygroscopicity

S. Deshmukh et al.

## Supplementary findings.

5 Table S1. List of substances and their relevant properties investigated in this study.

| Molecular Structure                                                                 | Compounds                      | Chemical formula                              | Molar weight (g mol <sup>-1</sup> ) | Density (g cm <sup>-3</sup> ) | Solubility (g mL <sup>-1</sup> ) | O/C  | K <sub>measured</sub> (90% RH)<br>*This work                         |
|-------------------------------------------------------------------------------------|--------------------------------|-----------------------------------------------|-------------------------------------|-------------------------------|----------------------------------|------|----------------------------------------------------------------------|
| 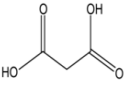   | Malonic acid <sup>1</sup>      | C <sub>3</sub> H <sub>4</sub> O <sub>4</sub>  | 104.06 <sup>a</sup>                 | 1.62 <sup>a</sup>             | 0.763 <sup>b</sup>               | 1.33 | 0.28*<br>0.26 <sup>d</sup><br>0.39 <sup>g</sup><br>0.52 <sup>g</sup> |
|    | Succinic acid <sup>1</sup>     | C <sub>4</sub> H <sub>6</sub> O <sub>4</sub>  | 118.09 <sup>a</sup>                 | 1.19 <sup>a</sup>             | 0.083 <sup>b</sup>               | 1    | 0.01*<br>0.002 <sup>g</sup>                                          |
|    | Adipic acid <sup>1</sup>       | C <sub>6</sub> H <sub>10</sub> O <sub>4</sub> | 146.14 <sup>a</sup>                 | 1.36 <sup>a</sup>             | 0.03 <sup>b</sup>                | 0.67 | 0.001*<br>-0.003 <sup>g</sup>                                        |
|  | Pimelic acid <sup>1</sup>      | C <sub>7</sub> H <sub>12</sub> O <sub>4</sub> | 160.17 <sup>a</sup>                 | 1.33 <sup>a</sup>             | 0.05 <sup>b</sup>                | 0.57 | 0.01*<br>0.03 <sup>g</sup>                                           |
|  | Suberic acid <sup>1</sup>      | C <sub>8</sub> H <sub>14</sub> O <sub>4</sub> | 174.19 <sup>a</sup>                 | 1.3 <sup>a</sup>              | 0.0006 <sup>a</sup>              | 0.5  | 0.01*<br>-0.03 <sup>g</sup>                                          |
|  | Tartaric acid <sup>1</sup>     | C <sub>4</sub> H <sub>6</sub> O <sub>6</sub>  | 150.09 <sup>a</sup>                 | 1.79 <sup>a</sup>             | 1.43 <sup>d</sup>                | 1.5  | 0.18*<br>0.22 <sup>g</sup>                                           |
|  | Maleic acid <sup>1</sup>       | C <sub>4</sub> H <sub>4</sub> O <sub>4</sub>  | 116.07 <sup>a</sup>                 | 1.59 <sup>a</sup>             | 0.79 <sup>a</sup>                | 1    | 0.19*<br>0.30 <sup>g</sup><br>0.23 <sup>g</sup>                      |
|  | Tricarballic acid <sup>1</sup> | C <sub>6</sub> H <sub>8</sub> O <sub>6</sub>  | 176.12 <sup>a</sup>                 | 1.37 <sup>a</sup>             | 0.05 <sup>a</sup>                | 1.33 | 0.12*                                                                |
|  | Vanillic acid <sup>1</sup>     | C <sub>8</sub> H <sub>8</sub> O <sub>4</sub>  | 168.12 <sup>a</sup>                 | 1.4 <sup>a</sup>              | 0.01 <sup>a</sup>                | 0.66 | 0.01*                                                                |
|  | Meso-Erythritol <sup>1</sup>   | C <sub>4</sub> H <sub>10</sub> O <sub>4</sub> | 122.12 <sup>a</sup>                 | 1.45 <sup>a</sup>             | 0.37 <sup>a</sup>                | 1.33 | 0.07*                                                                |
|  | Xylitol <sup>1</sup>           | C <sub>5</sub> H <sub>12</sub> O <sub>5</sub> | 152.15 <sup>a</sup>                 | 1.52 <sup>a</sup>             | 0.642 <sup>b</sup>               | 1    | 0.11*                                                                |

|                                                                                     |                                    |                                               |                     |                    |                      |      |                                                  |
|-------------------------------------------------------------------------------------|------------------------------------|-----------------------------------------------|---------------------|--------------------|----------------------|------|--------------------------------------------------|
|    | 1,4-Butanediol <sup>1</sup>        | C <sub>4</sub> H <sub>10</sub> O <sub>2</sub> | 90.12 <sup>a</sup>  | 1.01 <sup>a</sup>  | 1.017 <sup>a</sup>   | 0.66 | 0.03*                                            |
|    | Levoglucosan <sub>1</sub>          | C <sub>6</sub> H <sub>6</sub> O <sub>5</sub>  | 162.14 <sup>a</sup> | 1.69 <sup>a</sup>  | 1.334 <sup>c</sup>   | 1.11 | 0.16*<br>0.18 <sup>i</sup><br>0.165 <sup>h</sup> |
|    | Glucose <sup>1</sup>               | C <sub>6</sub> H <sub>12</sub> O <sub>6</sub> | 180.15 <sup>a</sup> | 1.54 <sup>a</sup>  | 0.909 <sup>f</sup>   | 1.33 | 0.13*<br>0.15 <sup>h</sup><br>0.13 <sup>c</sup>  |
|    | D(-)fructose <sup>1</sup>          | C <sub>6</sub> H <sub>12</sub> O <sub>6</sub> | 180.16 <sup>a</sup> | 1.59 <sup>a</sup>  | 3.75 <sup>a</sup>    | 1    | 0.09*<br>0.23 <sup>g</sup>                       |
|    | D(+)mannose <sub>1</sub>           | C <sub>6</sub> H <sub>12</sub> O <sub>6</sub> | 180.16 <sup>a</sup> | 1.54 <sup>a</sup>  | 2.48 <sup>a</sup>    | 1    | 0.08*<br>0.14 <sup>g</sup>                       |
|    | 2,3-Butanedione <sup>1</sup>       | C <sub>4</sub> H <sub>6</sub> O <sub>2</sub>  | 86.09 <sup>a</sup>  | 0.001 <sup>a</sup> | 0.981 <sup>a</sup>   | 0.5  | 0.01*                                            |
|   | Humic acid <sup>2</sup>            | C <sub>9</sub> H <sub>9</sub> NO <sub>6</sub> | 227.17 <sup>a</sup> | 1.77 <sup>a</sup>  | 0.01 <sup>a</sup>    | 0.8  | 0.07*                                            |
|  | 4-Hydrobenzoic acid <sup>1</sup>   | C <sub>7</sub> H <sub>6</sub> O <sub>3</sub>  | 138.12 <sup>a</sup> | 1.46 <sup>a</sup>  | 0.005 <sup>a</sup>   | 0.57 | 0.01*                                            |
|  | Methane Sulfonic acid <sup>1</sup> | CH <sub>4</sub> O <sub>3</sub> S              | 96.11 <sup>a</sup>  | 1.48 <sup>a</sup>  | 1.47 <sup>a</sup>    | -    | 0.21*                                            |
|  | Tetrahydrofuran <sup>1</sup>       | C <sub>4</sub> H <sub>8</sub> O               | 72.11 <sup>a</sup>  | 0.89 <sup>a</sup>  | 0.88 <sup>a</sup>    | 0.33 | 0.01*                                            |
|  | Naphthalene <sup>1</sup>           | C <sub>10</sub> H <sub>8</sub>                | 128.17 <sup>a</sup> | 1.16 <sup>a</sup>  | 0.00003 <sup>a</sup> | 0    | 0.17*                                            |

Supplier purity, <sup>1</sup>Sigma Aldrich, ≥ 99 %, <sup>2</sup>Fluka, 98%. <sup>a</sup><https://www.chemicalbook.com/> (last access: 05 December 2025).

<sup>b</sup><https://pubchem.ncbi.nlm.nih.gov/> (last access: 05 December 2025). <sup>c</sup><https://www.chemspider.com/> (last access: 05

December 2025). <sup>d</sup>Peng et al. (2001). <sup>e</sup>Lei et al. (2023). <sup>f</sup>Chan et al. (2008). <sup>g</sup>Previous literature κ values used from reference

Table 2, S. Han et al. (2022). <sup>h</sup>Koehler et al. (2006). <sup>i</sup>Mochida et al. (2004)

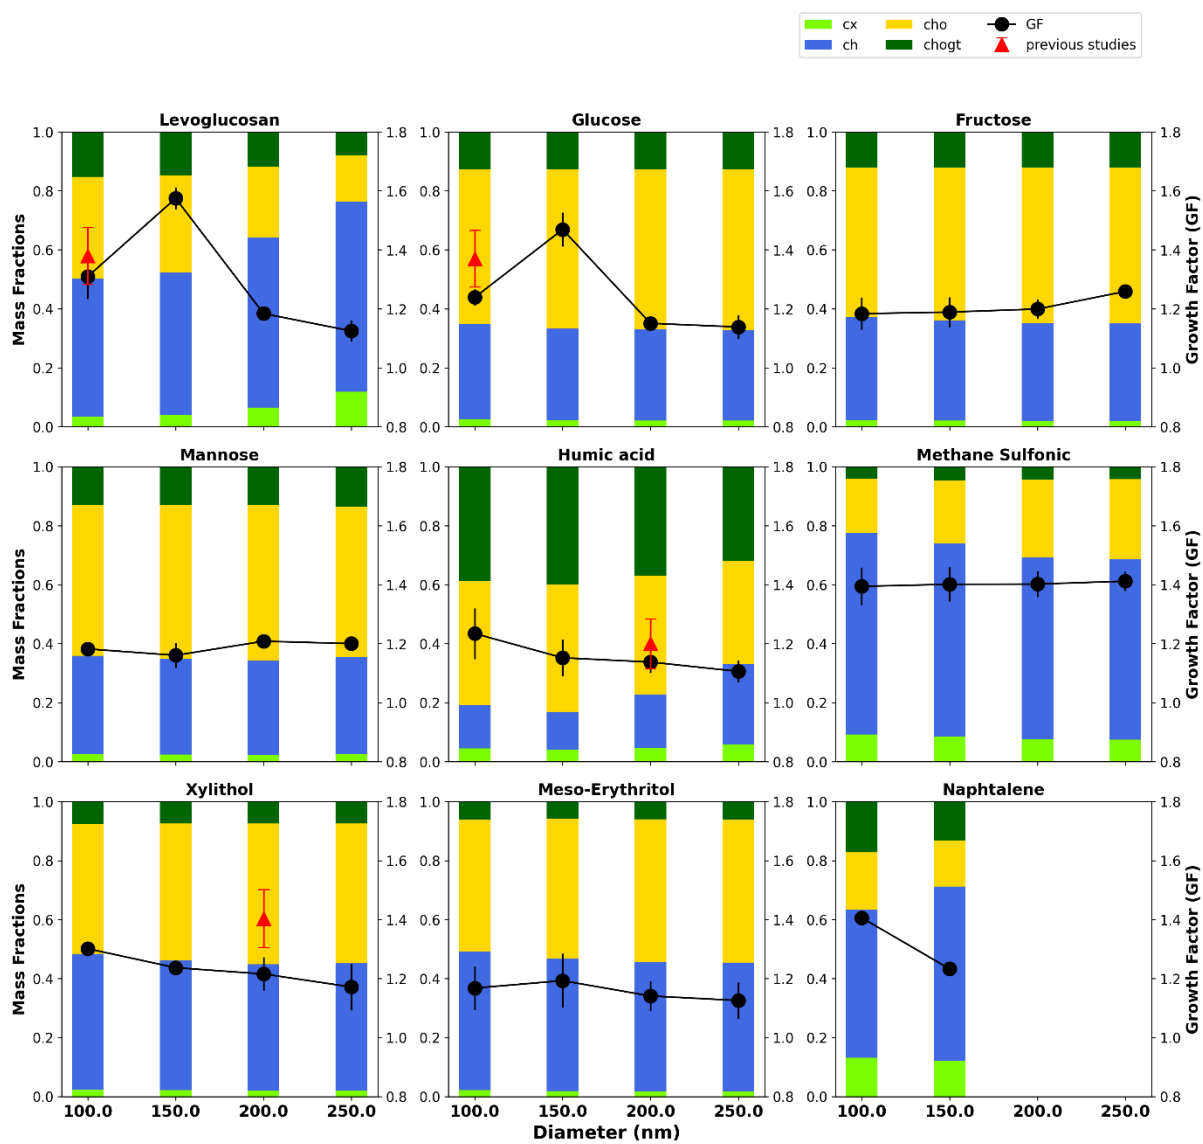

Figure S1: The family groups (Cx, CH, CHO, CHOgt1) mass fractions and hygroscopic growth values of straight-chain dicarboxylic acid particles for different diameters were measured in this study, and their comparison with previous studies

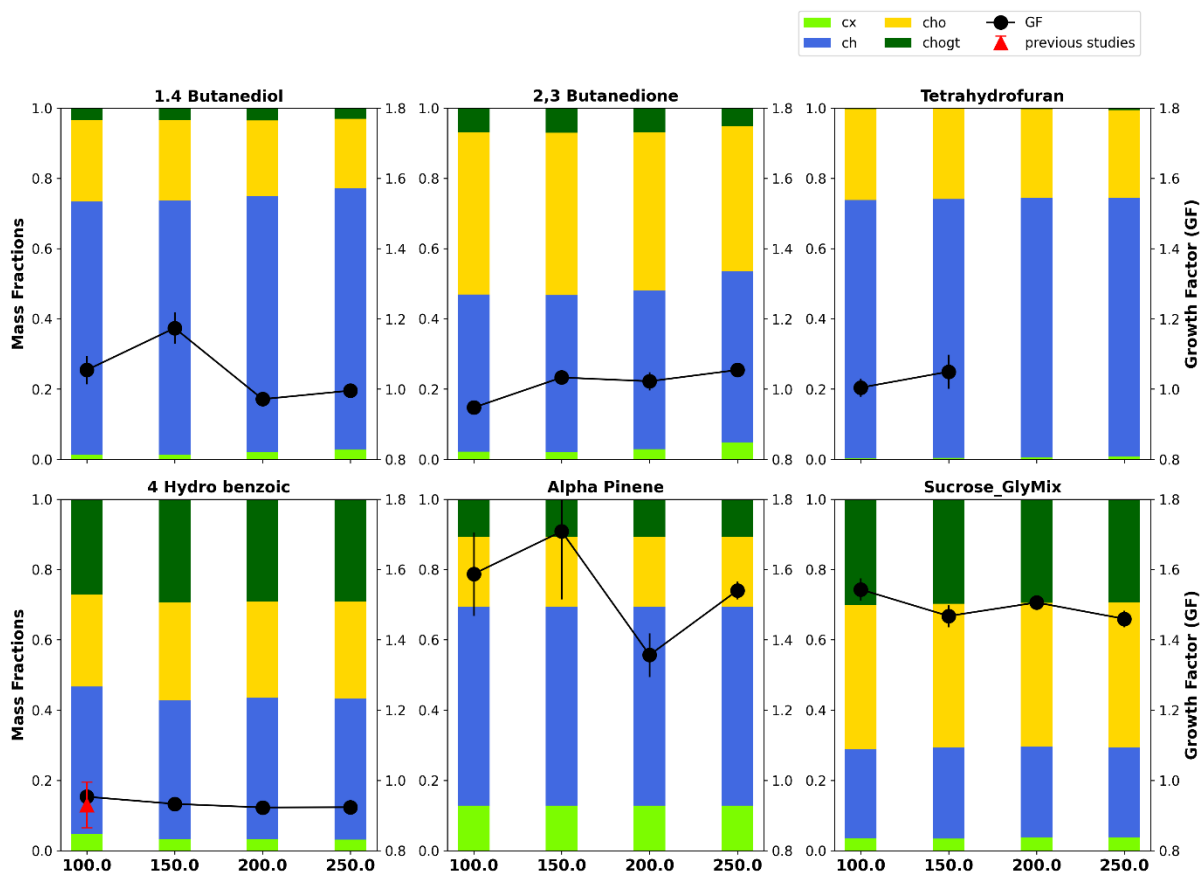

Figure S2: The family groups (Cx, CH, CHO, CHOgt1) mass fractions and hygroscopic growth values of straight-chain dicarboxylic acid particles for different diameters were measured in this study, and their comparison with previous studies.

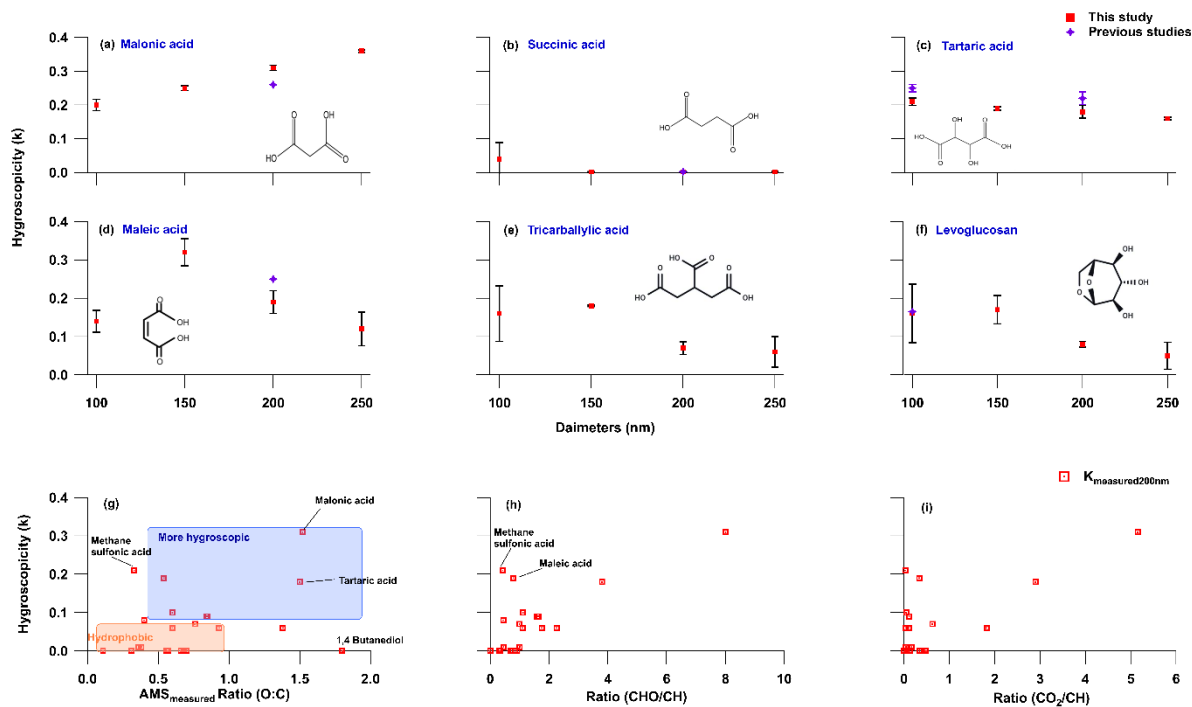

20 Figure S3: The hygroscopic growth ( $\kappa_{org}$ ) variation of organic compounds for different diameters, measured in this study, and compared with previous literature (a-f).  $\kappa_{org}$ 's relation to the measured O:C ratio from AMS and comparison for CHO and CH structures for 200nm with other diameters in Fig S7 and the supplementary supporting files.

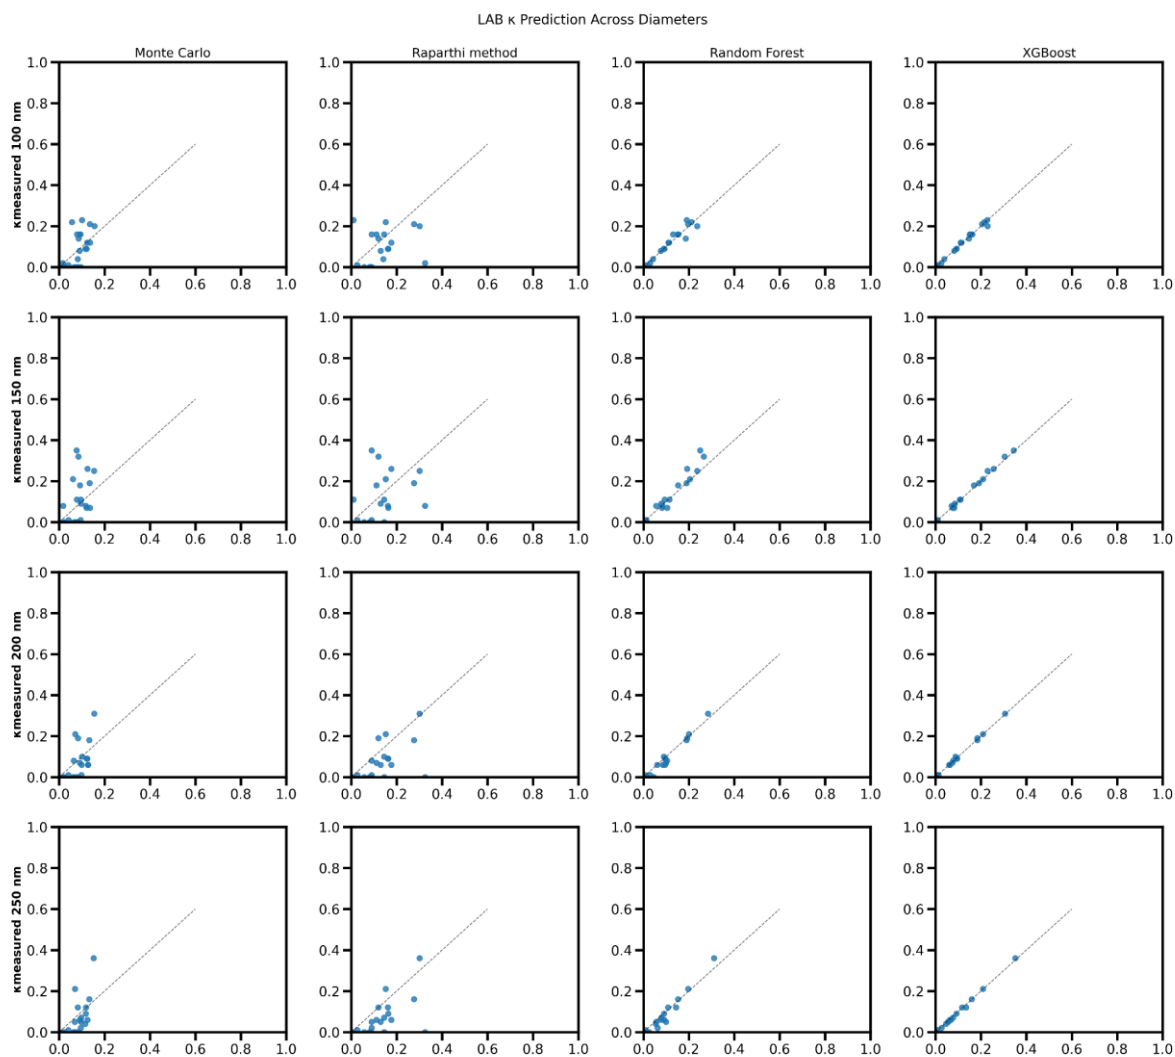

25 **Figure S4: Estimation of  $\kappa_{org}$  using Monte Carlo for laboratory standard organic compounds using family group kappa classifications, Monte Carlo, and ML models at different diameters.**

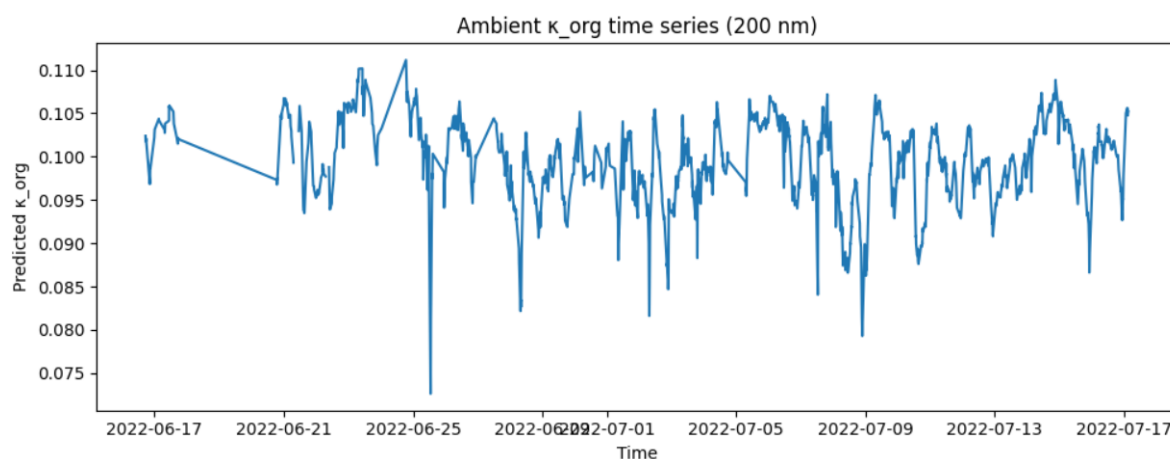

**Figure S5: Estimation of  $\kappa_{org}$  using the RF model with pre-test laboratory standard organic compound using family group kappa classifications. Testing on ambient measurements from Paris at 200nm.**

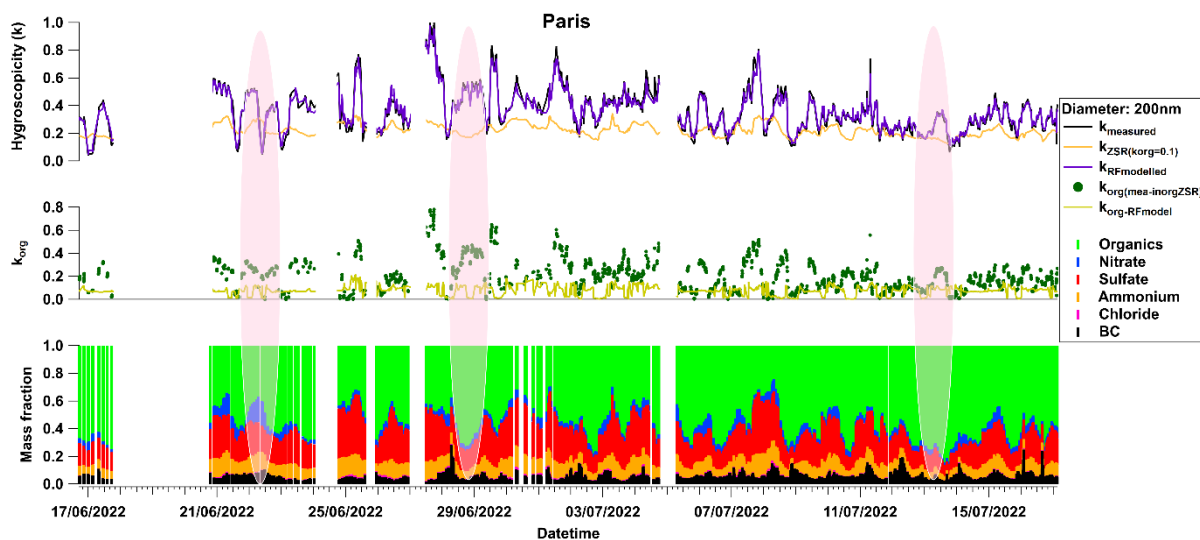

30

Figure S6: Comparison of  $\kappa$  from ZSR and ML output (RF) for 200nm with variation of  $\kappa_{\text{org}}$  in both methods at Paris measurement. Shaded regions indicate events with high organic-mass fractions. For other diameters, the outputs are in supplementary files.

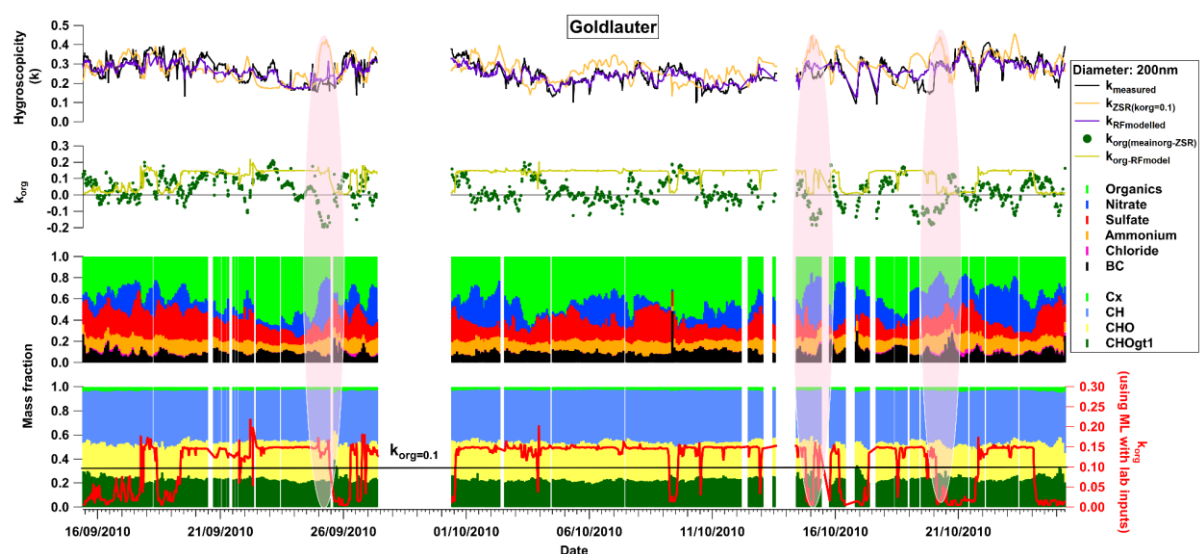

35

Figure S7: Comparison of  $\kappa$  from ZSR and ML output (RF) for 200nm with variation of  $\kappa_{\text{org}}$  in both methods at Goldlauter measurement. Shaded regions indicate events with high organic-mass fractions. For other diameters, the outputs are in supplementary files.

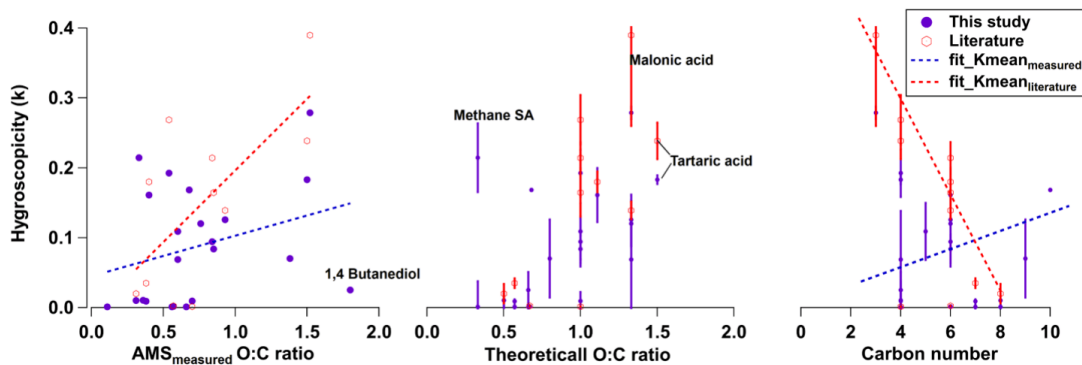

| Compound              | Kmean thiswork | SD        | Kmean_lit  | SD        | Ratio_OC | Therotical_OC | Carbon Number |
|-----------------------|----------------|-----------|------------|-----------|----------|---------------|---------------|
| Malonic               | 0.278813958    | 0.0089417 | 0.39       | 0.13      | 1.52     | 1.33          | 3             |
| Succinic              | 0.009299852    | 0.0128527 | 0.0015     | 0.0007071 | 0.7      | 1             | 4             |
| Adipic                | 0.001622189    | 0.0006153 | 0.0025     | 0.0007071 | 0.57     | 0.67          | 6             |
| Tartaric              | 0.183006991    | 0.0061137 | 0.2385     | 0.026163  | 1.5      | 1.5           | 4             |
| Pimelic               | 0.009254055    | 0.0026958 | 0.035      | 0.0070711 | 0.38     | 0.57          | 7             |
| Suberic               | 0.01           | 0.0085466 | 0.02       | 0.0141421 | 0.31     | 0.5           | 8             |
| Maleic                | 0.192593935    | 0.0343255 | 0.26866667 | 0.0355715 | 0.54     | 1             | 4             |
| Vanillic              | 0.001          | 0.0051363 |            |           | 0.66     | 0.66          | 8             |
| Tricarballic          | 0.120228919    | 0.032664  |            |           | 0.76     | 1.33          | 6             |
| 1,4 Butanediol        | 0.025031696    | 0.0259572 |            |           | 1.8      | 0.66          | 4             |
| 2,3 Butanedione       | 0.010545132    | 0.0113523 |            |           | 0.36     | 0.5           | 4             |
| Tetrahydrofuran       | 0.00087935     | 0.0367771 |            |           | 0.11     | 0.33          | 4             |
| 4 Hydrobenzoic        | 0.001          | 0.0034148 |            |           | 0.56     | 0.57          | 7             |
| Levogluconan          | 0.161019629    | 0.0388532 | 0.18       | 0.015     | 0.4      | 1.11          | 6             |
| Glucose               | 0.125699584    | 0.0358455 | 0.139      | 0.0127279 | 0.93     | 1.33          | 6             |
| Fructose              | 0.09430123     | 0.0358038 | 0.214      | 0.0226274 | 0.84     | 1             | 6             |
| Mannose               | 0.08385672     | 0.020167  | 0.1645     | 0.0346482 | 0.85     | 1             | 6             |
| Humic acid            | 0.070255187    | 0.0558627 |            | 0.005     | 1.38     | 0.8           | 9             |
| Methane Sulfonic acid | 0.214600225    | 0.0494163 |            | 0.001     | 0.33     | 0.33          |               |
| Xylithol              | 0.108872738    | 0.0409536 |            | 0.007     | 0.6      | 1             | 5             |
| Meso-Erythritol       | 0.068735949    | 0.069378  |            | 0.014     | 0.6      | 1.33          | 4             |
| Naphtalene            | 0.168301687    | 0.0013129 |            | 0.01      | 0.68     | 0.68          | 10            |

Figure S8: Comparison of  $\kappa_{\text{measured}}$  from this study to the Literature with the O:C ratio and Carbon number. Here,  $\kappa_{\text{mean}}$  is the average of all diameters (100, 150, 200, and 250nm), with the standard deviation for this work, referred to as bulk  $\kappa_{\text{measured}}$ . This is similar to  $\kappa_{\text{mean-lit}}$ , which is the average of all previous studies' measurements for available compounds. For  $\kappa_{\text{mean-lit}}$  data points, refer to Table S1.

40

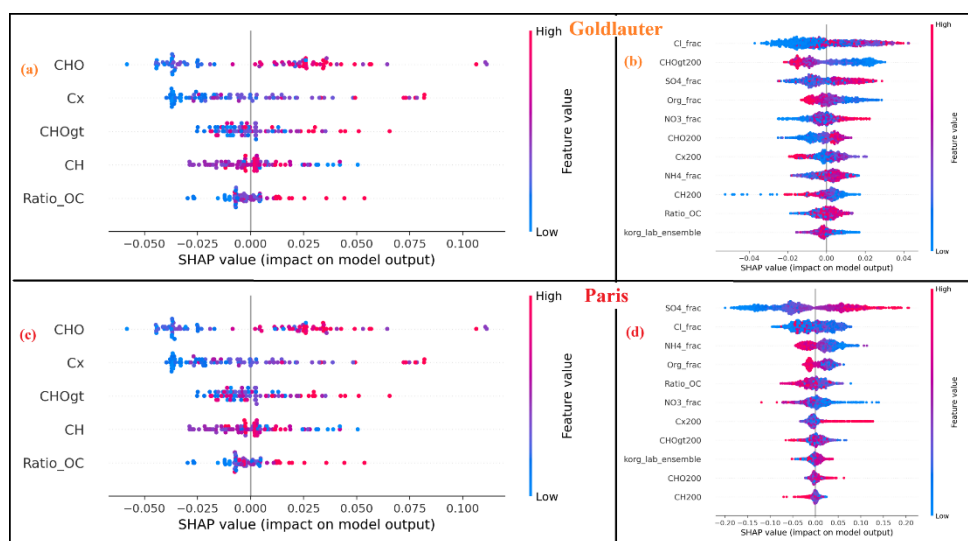

Figure S9: Model interpretability was analysed using permutation importance and Shapley additive explanations value diagnostics, confirming that oxygenation level (O:C), CHOgt, CH family groups, and inorganic fractions are the dominant predictors for  $\kappa_{\text{org}}$  and  $\kappa_{\text{measured}}$ , respectively. (a & c) The laboratory SHAP interpretation, similarly using ambient data (b & d), is shown for the Goldlauter and Paris sides in the top and bottom panels, respectively.

45
